# Supplementary material for: Comparing Kidney Health Outcomes in Children, Adolescents, and Adults With Focal Segmental Glomerulosclerosis
Source: PubMed Central journal article supplement (PMC9412226; doi:10.1001/jamanetworkopen.2022.28701), 2022-08-25
Supplement: jamanetwopen-e2228701-s001.pdf [file jamanetwopen-e2228701-s001.pdf]

## Supplemental Online Content

Gipson DS, Troost JP, Spino C, et al. Comparing kidney health outcomes in children, adolescents, and adults with focal segmental glomerulosclerosis. *JAMA Netw Open*. 2022;5(8):e2228701. doi:10.1001/jamanetworkopen.2022.28701

**eTable 1.** Minimal Detectable Differences by Outcome With 80% Power and 2-Sided Alpha

**eTable 2.** NEPTUNE: Baseline Demographic, Clinical, Genetic, and Laboratory Characteristics of Participants With FSGS by Age

**eTable 3.** FSGS-CT: Baseline Demographic, Clinical, Genetic, and Laboratory Characteristics of Randomized Participants by Age

**eTable 4.** KRN: Baseline Demographic, Clinical, and Laboratory Characteristics of Participants by Age at FSGS Biopsy

**eTable 5.** Pooled (NEPTUNE, KRN): Medication Exposures Before and After Biopsy by Age

**eTable 6.** NEPTUNE: Logistic Regression Models of Immunosuppressive Therapy Treatment (Treated vs Untreated) Among Participants Who Were Treatment Naive at Biopsy

**eTable 7.** Sensitivity Analyses of Potential Confounding and Excluding Monogenic Disease

**eTable 8.** Tests of Effect Modification in Cox Proportional Hazard Models of Time to ESKD or 40% Reduction in eGFR and of Time to Complete Remission by Study

**eTable 9.** Results of Linear-Mixed Effects Models of eGFR After Biopsy by Study and Pooled

**eFigure 1.** NEPTUNE: Participants Included in NEPTUNE Analyses

**eFigure 2.** KRN: Participants Included in KRN Analyses

**eFigure 3.** Time to ESKD by Age

**eFigure 4.** KRN: Time to ESKD by Age

**eFigure 5.** Time to ESKD or 40% Reduction in eGFR by Age: Significant Effect Modification by Sex in FSGS-CT

**eFigure 6.** Time to ESKD or 40% Reduction in eGFR by Age: Significant Effect Modification by Baseline UP:C Ratio in NEPTUNE

**eFigure 7.** Time To Complete or Partial Remission by Age (Partial Remission Defined as UP:C Ratio <3.5 g/g and 50% Reduction in UP:C Ratio From Baseline)

This supplemental material has been provided by the authors to give readers additional information about their work.

**eTable 1. Minimal Detectable Differences by Outcome With 80% Power and 2-Sided Alpha**

| Outcome                   | Study   | Comparison (vs. adults) | Observed difference* | Minimum Detectable Difference with 80% power* |
|---------------------------|---------|-------------------------|----------------------|-----------------------------------------------|
|                           |         |                         | HR                   | HR                                            |
| ESKD/40%reduction in eGFR | NEPTUNE | Children                | 0.95                 | 0.38                                          |
|                           |         | Adolescents             | 0.75                 | 0.39                                          |
|                           | FSGS-CT | Children                | 0.84                 | 0.38                                          |
|                           |         | Adolescents             | 0.92                 | 0.39                                          |
|                           | KRN     | Children                | 1.24                 | 0.55                                          |
|                           |         | Adolescents             | 1.14                 | 0.45                                          |
|                           |         | Pooled                  | Children             | 1.12                                          |
|                           |         | Adolescents             | 1.06                 | 0.64                                          |
| ESKD                      | NEPTUNE | Children                | 0.00                 | 0.20                                          |
|                           |         | Adolescents             | 0.00                 | 0.21                                          |
|                           | FSGS-CT | Children                | 0.53                 | 0.26                                          |
|                           |         | Adolescents             | 1.01                 | 0.27                                          |
|                           | KRN     | Children                | 0.80                 | 0.42                                          |
|                           |         | Adolescents             | 1.01                 | 0.52                                          |
|                           |         | Pooled                  | Children             | 0.67                                          |
|                           |         | Adolescents             | 0.85                 | 0.58                                          |
|                           |         |                         | Mean Difference      | Mean Difference                               |
| eGFR slope                | NEPTUNE | Children                | -2.12                | 5.92                                          |
|                           |         | Adolescents             | -2.14                | 5.70                                          |
|                           | FSGS-CT | Children                | -2.24                | 6.19                                          |
|                           |         | Adolescents             | -3.65                | 5.99                                          |
|                           | KRN     | Children                | -0.61                | 6.28                                          |
|                           |         | Adolescents             | -0.85                | 4.74                                          |
|                           |         | Pooled                  | Children             | -1.61                                         |
|                           |         | Adolescents             | -2.13                | 3.05                                          |
| Complete remission        | NEPTUNE | Children                | 1.90                 | 2.92                                          |
|                           |         | Adolescents             | 1.88                 | 2.81                                          |
|                           | FSGS-CT | Children                | 1.77                 | 3.32                                          |
|                           |         | Adolescents             | 1.50                 | 3.19                                          |

| <b>Outcome</b>             | <b>Study</b> | <b>Comparison (vs. adults)</b> | <b>Observed difference*</b> | <b>Minimum Detectable Difference with 80% power*</b> |
|----------------------------|--------------|--------------------------------|-----------------------------|------------------------------------------------------|
|                            | Pooled       | Children                       | 1.84                        | 2.33                                                 |
|                            |              | Adolescents                    | 1.68                        | 2.10                                                 |
| Complete/partial remission | NEPTUNE      | Children                       | 1.06                        | 2.06                                                 |
|                            |              | Adolescents                    | 1.04                        | 2.01                                                 |
|                            | FSGS-CT      | Children                       | 0.91                        | 2.12                                                 |
|                            |              | Adolescents                    | 0.90                        | 2.07                                                 |
|                            | Pooled       | Children                       | 1.00                        | 1.63                                                 |
|                            |              | Adolescents                    | 1.00                        | 1.62                                                 |

\*Hazard ratio for ESKD/40%reduction in eGFR, ESKD, complete remission, and complete/partial remission; mean difference in slope per year for eGFR slope

**eTable 2. NEPTUNE: Baseline Demographic, Clinical, Genetic, and Laboratory Characteristics of Participants With FSGS by Age**

Descriptive statistics are presented as number (percent) or median (25th, 75th percentile).

| Characteristic              | Descriptive Statistics |                                 |                                           |                                  | p-value comparisons |              |         |         |         |
|-----------------------------|------------------------|---------------------------------|-------------------------------------------|----------------------------------|---------------------|--------------|---------|---------|---------|
|                             | Overall<br>(n=166)     | 1: Children<br>Age<13<br>(n=32) | 2:<br>Adolescents<br>Age:13- 17<br>(n=29) | 3: Adults<br>Age: ≥18<br>(n=105) | 1 vs. 2<br>vs. 3    | 1+2 vs.<br>3 | 1 vs. 2 | 2 vs. 3 | 1 vs. 3 |
| Age <sup>^</sup> , years    | 30 (14, 50)            | 7 (5, 11)                       | 15 (14, 16)                               | 46 (31, 58)                      | ---                 | ---          | ---     | ---     | ---     |
| Female                      | 67 (40)                | 19 (59)                         | 9 (31)                                    | 39 (37)                          | 0.04                | 0.27         | 0.03    | 0.54    | 0.03    |
| Race                        |                        |                                 |                                           |                                  | 0.004               | 0.01         | 0.33    | 0.01    | 0.03    |
| Asian                       | 10 (6)                 | 2 (7)                           | 2 (7)                                     | 6 (6)                            |                     |              |         |         |         |
| Black                       | 60 (37)                | 12 (41)                         | 17 (63)                                   | 31 (30)                          |                     |              |         |         |         |
| Other                       | 4 (2)                  | 3 (10)                          | 0 (0)                                     | 1 (1)                            |                     |              |         |         |         |
| White                       | 85 (54)                | 12 (41)                         | 8 (30)                                    | 65 (63)                          |                     |              |         |         |         |
| Unknown, n                  | 7                      | 3                               | 2                                         | 2                                |                     |              |         |         |         |
| Hispanic                    | 36 (22)                | 8 (25)                          | 6 (22)                                    | 22 (21)                          | 0.89                | 0.68         | 0.80    | 0.89    | 0.63    |
| Age at onset                | 26 (12, 43)            | 5 (2, 10)                       | 14 (13, 15)                               | 41 (29, 58)                      | ---                 | ---          | ---     | ---     | ---     |
| APOL1 genotype              |                        |                                 |                                           |                                  | <0.001              | <0.001       | 0.04    | <0.001  | 0.19    |
| 2 risk alleles              | 30 (20)                | 5 (22)                          | 14 (50)                                   | 11 (11)                          |                     |              |         |         |         |
| 0-1 risk alleles            | 117 (80)               | 18 (78)                         | 14 (50)                                   | 85 (89)                          |                     |              |         |         |         |
| Unknown, n                  | 19                     | 9                               | 1                                         | 9                                |                     |              |         |         |         |
| Interstitial fibrosis, %    | 15 (3, 27)             | 1 (0, 5)                        | 10 (0, 18)                                | 20 (10, 42)                      | <0.001              | <0.001       | 0.01    | <0.001  | <0.001  |
| Global sclerosis, %         | 10 (0, 39)             | 0 (0, 1)                        | 7 (2, 14)                                 | 22 (7, 53)                       | <0.001              | <0.001       | 0.004   | 0.007   | <0.001  |
| Segmental sclerosis, %      | 7 (3, 16)              | 4 (0, 13)                       | 9 (3, 16)                                 | 8 (4, 18)                        | 0.12                | 0.11         | 0.16    | 0.71    | 0.04    |
| Edema, %                    | 63 (39)                | 14 (44)                         | 11 (42)                                   | 38 (37)                          | 0.76                | 0.47         | 0.91    | 0.64    | 0.51    |
| Missing                     | 0                      | 0                               | 3                                         | 3                                |                     |              |         |         |         |
| Blood pressure <sup>^</sup> |                        |                                 |                                           |                                  | <0.001              | <0.001       | 0.01    | <0.001  | 0.002   |
| Normal                      | 60 (38)                | 10 (32)                         | 19 (70)                                   | 31 (30)                          |                     |              |         |         |         |
| Pre-hypertensive            | 50 (31)                | 4 (13)                          | 1 (4)                                     | 45 (44)                          |                     |              |         |         |         |
| Hypertension                | 50 (31)                | 17 (55)                         | 7 (26)                                    | 26 (25)                          |                     |              |         |         |         |
| Unknown, n                  | 6                      | 1                               | 2                                         | 3                                |                     |              |         |         |         |
| Weight status <sup>^</sup>  |                        |                                 |                                           |                                  | 0.60                | 0.44         | 0.04    | 0.02    | 0.96    |
| Underweight                 | 3 (2)                  | 1 (3)                           | 0 (0)                                     | 2 (2)                            |                     |              |         |         |         |
| Normal weight               | 35 (23)                | 5 (16)                          | 12 (46)                                   | 18 (19)                          |                     |              |         |         |         |

|                                               |                               |                 |                |                |                            |        |        |       |        |
|-----------------------------------------------|-------------------------------|-----------------|----------------|----------------|----------------------------|--------|--------|-------|--------|
| Overweight                                    | 45 (29)                       | 11 (34)         | 3 (12)         | 31 (32)        |                            |        |        |       |        |
| Obese                                         | 72 (46)                       | 15 (47)         | 11 (42)        | 46 (47)        |                            |        |        |       |        |
| <b>Characteristic</b>                         | <b>Descriptive Statistics</b> |                 |                |                | <b>p-value comparisons</b> |        |        |       |        |
| Unknown, n                                    | 11                            | 0               | 3              | 8              |                            |        |        |       |        |
| UP:C <sup>^</sup> (g/g)                       | 3.8 (1.9, 7.5)                | 6.4 (3.1, 15.1) | 2.3 (1.3, 7.9) | 3.7 (1.9, 5.7) | 0.003                      | 0.13   | 0.005  | 0.38  | 0.002  |
| 0.3-1.4                                       | 29 (17)                       | 4 (13)          | 8 (28)         | 17 (16)        |                            |        |        |       |        |
| 1.5-3.4                                       | 50 (30)                       | 5 (16)          | 11 (38)        | 34 (32)        |                            |        |        |       |        |
| ≥3.5                                          | 87 (52)                       | 23 (72)         | 10 (34)        | 54 (51)        |                            |        |        |       |        |
| eGFR <sup>^</sup> , ml/min/1.73m <sup>2</sup> | 72 (46, 95)                   | 94 (79, 113)    | 80 (69, 95)    | 57 (36, 85)    | <0.001                     | <0.001 | 0.02   | 0.002 | <0.001 |
| ≥90                                           | 49 (30)                       | 18 (58)         | 9 (35)         | 22 (21)        |                            |        |        |       |        |
| 60-89                                         | 51 (31)                       | 12 (39)         | 14 (56)        | 25 (24)        |                            |        |        |       |        |
| 30-59                                         | 48 (30)                       | 1 (3)           | 3 (12)         | 44 (42)        |                            |        |        |       |        |
| ≤30                                           | 14 (9)                        | 0 (0)           | 0 (0)          | 14 (13)        |                            |        |        |       |        |
| Unknown, n                                    | 4                             | 1               | 0              | 0              |                            |        |        |       |        |
| Serum albumin <sup>^</sup> , g/dL             | 3.3 (2.4, 4.0)                | 3.1 (2.0, 3.7)  | 3.1 (2.2, 4.2) | 3.7 (2.8, 4.1) | 0.02                       | 0.02   | 0.33   | 0.52  | 0.004  |
| ≥3.5                                          | 53 (46)                       | 8 (28)          | 10 (48)        | 35 (53)        |                            |        |        |       |        |
| 2.5-3.4                                       | 31 (27)                       | 9 (31)          | 2 (10)         | 20 (30)        |                            |        |        |       |        |
| <2.5                                          | 32 (28)                       | 12 (41)         | 9 (43)         | 11 (17)        |                            |        |        |       |        |
| Unknown, n                                    | 50                            | 3               | 8              | 39             |                            |        |        |       |        |
| Nephrotic syndrome                            | 54 (33)                       | 18 (56)         | 8 (28)         | 28 (27)        | 0.01                       | 0.03   | 0.02   | 0.92  | 0.002  |
| Treatment before biopsy                       |                               |                 |                |                |                            |        |        |       |        |
| Steroids                                      | 42 (25)                       | 24 (75)         | 8 (28)         | 10 (10)        | <0.001                     | <0.001 | <0.001 | 0.01  | <0.001 |
| CNI                                           | 9 (5)                         | 3 (9)           | 3 (10)         | 3 (3)          | 0.16                       | 0.06   | 0.90   | 0.08  | 0.11   |
| CTX                                           | 2 (1)                         | 1 (3)           | 0 (0)          | 1 (1)          | 0.50                       | 0.70   | 0.34   | 0.60  | 0.37   |
| MMF                                           | 6 (4)                         | 4 (13)          | 1 (3)          | 1 (1)          | 0.01                       | 0.02   | 0.20   | 0.33  | 0.002  |
| Rituximab                                     | 0 (0)                         | 0 (0)           | 0 (0)          | 0 (0)          | ---                        | ---    | ---    | ---   | ---    |
| Other IST                                     | 3 (2)                         | 0 (0)           | 0 (0)          | 3 (3)          | 0.41                       | 0.18   | ---    | 0.36  | 0.33   |
|                                               |                               |                 |                |                |                            |        |        |       |        |
| RAAS Blockade                                 | 71 (43)                       | 11 (34)         | 7 (24)         | 53 (50)        | 0.02                       | 0.01   | 0.38   | 0.01  | 0.11   |

<sup>^</sup> at baseline

Abbreviations: APOL1, Apolipoprotein L1; CNI, Calcineurin inhibitors; CTX, Cytoxan; eGFR, estimated glomerular filtration rate; HDL, high density lipoprotein; IQR, interquartile range; IST, immunosuppressive therapy; LDL, low density lipoprotein; MMF, mycophenolate mofetil; NEPTUNE, Nephrotic Syndrome Study Network; RAAS, renin-angiotensin system; UP:C, urine protein: creatinine ratio

Definitions: p-value comparisons are from Kreskas-Wallis tests for continuous variables and chi-square tests for categorical variables. Percentages and p-values are based on complete case analyses (i.e., do not include participants with missing data). eGFR was calculated using the creatinine-based modified CKiD formula in children and adolescents and the CKD-EPI equation in adults.<sup>17, 18</sup> Blood pressure categorized as follows: normal = systolic ≤120 mm Hg and diastolic ≤8 mm Hg 0, or systolic and diastolic percentile ≤90 for

children and adolescents; Pre-hypertensive(systolic>120 mm Hg or diastolic>80 mm Hg,or systolic/diastolic percentile 90-95 for children and adolescents; Hypertension= systolic>140 mm Hg or diastolic >90 mm Hg, or systolic/diastolic percentile>95 for children and adolescents.<sup>12, 13</sup> Weight status categorized as follows: underweight=BMI<18.5 or BMI percentile <5 for children and adolescents; normal weight=BMI18.5-25 or BMI percentile 5-85 for children and adolescents; overweight=BMI 25-30 or BMI percentile 85-95 for children and adolescents; obese=BMI≥30 or BMI percentile >95<sup>th</sup> for children and adolescents.<sup>14</sup> Nephrotic Syndrome is categorized as UP:C≥3.5 + edema or serum albumin <3.0.

**eTable 3. FSGS-CT: Baseline Demographic, Clinical, Genetic, and Laboratory Characteristics of Randomized Participants by Age**

Descriptive statistics are presented as number (percent) or median (25th, 75th percentile).

| Characteristic                       | Descriptive Statistics |                                 |                                        |                                 | p-value comparisons |              |         |            |         |
|--------------------------------------|------------------------|---------------------------------|----------------------------------------|---------------------------------|---------------------|--------------|---------|------------|---------|
|                                      | Overall<br>(n=132)     | 1: Children<br>Age<13<br>(n=42) | 2: Adolescents<br>Age:13- 17<br>(n=48) | 3: Adults<br>Age: ≥18<br>(n=42) | 1 vs. 2 vs.<br>3    | 1+2<br>vs. 3 | 1 vs. 2 | 2 vs.<br>3 | 1 vs. 3 |
| Age <sup>^</sup> , years             | 15 (11, 23)            | 7 (4, 11)                       | 15 (14, 16)                            | 31 (23, 34)                     | ---                 | ---          | ---     | ---        | ---     |
| Female                               | 61 (46)                | 19 (45)                         | 22 (46)                                | 20 (75)                         | 0.97                | 0.82         | 0.95    | 0.87       | 0.99    |
| Race                                 |                        |                                 |                                        |                                 | 0.32                | 0.44         | 0.34    | 0.33       | 0.34    |
| Asian                                | 3 (2)                  | 2 (5)                           | 1 (2)                                  | 0 (0)                           |                     |              |         |            |         |
| Black                                | 50 (38)                | 15 (36)                         | 16 (33)                                | 19 (45)                         |                     |              |         |            |         |
| Native American/<br>Pacific Islander | 2 (1)                  | 1 (2)                           | 0 (0)                                  | 1 (2)                           |                     |              |         |            |         |
| Other                                | 2 (1)                  | 2 (5)                           | 0 (0)                                  | 0 (0)                           |                     |              |         |            |         |
| White                                | 75 (57)                | 22 (52)                         | 31 (65)                                | 22 (52)                         |                     |              |         |            |         |
| Hispanic                             | 23 (17)                | 6 (14)                          | 12 (26)                                | 5 (12)                          | 0.21                | 0.25         | 0.20    | 0.11       | 0.75    |
| Age at onset, years                  | 14 (9, 22)             | 6 (3, 10)                       | 14 (13, 15)                            | 29 (23, 33)                     | ---                 | ---          | ---     | ---        | ---     |
| APOL1 genotype                       |                        |                                 |                                        |                                 | 0.01                | 0.02         | 0.03    | 0.33       | 0.003   |
| 2 risk alleles                       | 25 (23)                | 2 (6)                           | 10 (25)                                | 13 (35)                         |                     |              |         |            |         |
| 0-1 risk alleles                     | 86 (77)                | 32 (94)                         | 30 (75)                                | 24 (65)                         |                     |              |         |            |         |
| Unknown, n                           | 21                     | 8                               | 8                                      | 5                               |                     |              |         |            |         |
| Interstitial fibrosis,<br>%          | 10 (4, 25)             | 5 (0, 10)                       | 10 (5, 20)                             | 18 (5, 40)                      | <0.001              | <0.001       | 0.001   | 0.03       | <0.001  |
| Global sclerosis, %                  | 0 (0, 12)              | 0 (0, 8)                        | 0 (0, 11)                              | 4 (0, 25)                       | 0.14                | 0.06         | 0.59    | 0.19       | 0.05    |
| Segmental<br>sclerosis, %            | 20 (9, 33)             | 11 (6, 20)                      | 25 (10, 38)                            | 22 (11, 36)                     | 0.001               | 0.11         | <0.001  | 0.73       | 0.001   |
| Edema                                |                        |                                 |                                        |                                 | 0.20                | 0.03         | 0.85    | 0.11       | 0.05    |
| None                                 | 76 (58)                | 25 (60)                         | 27 (56)                                | 24 (57)                         |                     |              |         |            |         |
| Pretibial                            | 38 (29)                | 10 (23)                         | 13 (27)                                | 16 (36)                         |                     |              |         |            |         |
| Above knee                           | 2 (2)                  | 0 (0)                           | 1 (2)                                  | 1 (2)                           |                     |              |         |            |         |
| Presacral                            | 2 (1)                  | 0 (0)                           | 0 (0)                                  | 2 (5)                           |                     |              |         |            |         |
| Ascites                              | 9 (7)                  | 4 (9)                           | 5 (10)                                 | 0 (0)                           |                     |              |         |            |         |
| Anasarca                             | 5 (4)                  | 3 (7)                           | 2 (4)                                  | 0 (0)                           |                     |              |         |            |         |
| Blood pressure <sup>^</sup>          |                        |                                 |                                        |                                 | <0.001              | 0.02         | 0.001   | 0.09       | 0.002   |
| Normal                               | 53 (40)                | 12 (29)                         | 27 (56)                                | 14 (34)                         |                     |              |         |            |         |
| Pre-hypertensive                     | 36 (27)                | 6 (14)                          | 12 (25)                                | 18 (44)                         |                     |              |         |            |         |

|                                               |                               |                |                 |                |                            |        |        |       |        |
|-----------------------------------------------|-------------------------------|----------------|-----------------|----------------|----------------------------|--------|--------|-------|--------|
| Hypertension                                  | 42 (32)                       | 24 (57)        | 9 (18)          | 9 (22)         |                            |        |        |       |        |
| Unknown, n                                    | 1                             | 0              | 0               | 1              |                            |        |        |       |        |
| <b>Characteristic</b>                         | <b>Descriptive Statistics</b> |                |                 |                | <b>p-value comparisons</b> |        |        |       |        |
| Weight status <sup>^</sup>                    |                               |                |                 |                | 0.12                       | 0.28   | 0.08   | 0.06  | 0.67   |
| Underweight                                   | 0 (0)                         | 0 (0)          | 0 (0)           | 0 (0)          |                            |        |        |       |        |
| Normal weight                                 | 50 (38)                       | 15 (36)        | 23 (48)         | 12 (29)        |                            |        |        |       |        |
| Overweight                                    | 33 (25)                       | 8 (19)         | 14 (29)         | 11 (26)        |                            |        |        |       |        |
| Obese                                         | 49 (37)                       | 19 (45)        | 12 (23)         | 19 (45)        |                            |        |        |       |        |
| UP:C at enrollment, g/g                       | 4.0 (2.2, 8.4)                | 5.8 (2.9, 8.5) | 4.3 (2.7, 10.3) | 3.0 (1.7, 5.1) | 0.01                       | 0.007  | 0.31   | 0.05  | 0.005  |
| 0.3-1.4                                       | 21 (16)                       | 5 (12)         | 7 (15)          | 9 (21)         |                            |        |        |       |        |
| 1.5-3.4                                       | 37 (28)                       | 8 (19)         | 13 (27)         | 16 (38)        |                            |        |        |       |        |
| ≥3.5                                          | 74 (56)                       | 29 (69)        | 28 (58)         | 17 (40)        |                            |        |        |       |        |
| eGFR <sup>^</sup> , ml/min/1.73m <sup>2</sup> | 82 (60, 116)                  | 123 (78, 154)  | 79 (55, 108)    | 68 (49, 96)    | <0.001                     | <0.001 | <0.001 | 0.27  | <0.001 |
| ≥90                                           | 59 (45)                       | 29 (69)        | 20 (42)         | 10 (24)        |                            |        |        |       |        |
| 60-89                                         | 36 (27)                       | 7 (17)         | 13 (27)         | 16 (38)        |                            |        |        |       |        |
| 30-59                                         | 34 (26)                       | 5 (12)         | 13 (27)         | 16 (38)        |                            |        |        |       |        |
| ≤30                                           | 3 (2)                         | 1 (2)          | 2 (4)           | 0 (0)          |                            |        |        |       |        |
| Serum albumin <sup>^</sup> , g/dL             | 2.8 (2.1, 3.7)                | 2.4 (1.8, 2.9) | 2.8 (2.1, 3.8)  | 3.6 (2.5, 3.9) | 0.001                      | 0.001  | 0.07   | 0.09  | 0.001  |
| ≥3.5                                          | 48 (33)                       | 5 (12)         | 16 (33)         | 21 (50)        |                            |        |        |       |        |
| 2.5-3.4                                       | 42 (32)                       | 15 (35)        | 15 (31)         | 12 (29)        |                            |        |        |       |        |
| <2.5                                          | 42 (32)                       | 22 (52)        | 17 (35)         | 9 (21)         |                            |        |        |       |        |
| Nephrotic syndrome                            | 60 (45)                       | 28 (67)        | 20 (42)         | 12 (29)        | 0.002                      | 0.01   | 0.02   | 0.20  | <0.001 |
| Steroids before enrollment, months            | 3 (2, 5)                      | 3 (2, 6)       | 2 (1, 4)        | 4 (2, 6)       | 0.02                       | 0.07   | 0.04   | 0.008 | 0.73   |

Abbreviations: APOL1, Apolipoprotein L1; CSA, Cyclosporine; eGFR, estimated glomerular filtration rate; IQR, interquartile range; IST, immunosuppressive therapy; MMF, mycophenolate mofetil; UP:C, urine protein: creatinine ratio

<sup>^</sup> at baseline

Definitions: p-value comparisons are from Kruskal-Wallis tests for continuous variables and chi-square tests for categorical variables. Percentages and p-values are based on complete case analyses (i.e., do not include participants with missing data). eGFR was calculated using the creatinine-based modified CKiD formula in children and adolescents and the CKD-EPI equation in adults.<sup>17, 18</sup> Blood pressure categorized as follows: normal = systolic ≤120 mm Hg and diastolic ≤8 mm Hg, or systolic and diastolic percentile ≤90 for children and adolescents; Pre-hypertensive (systolic >120 mm Hg or diastolic >80 mm Hg, or systolic/diastolic percentile 90-95 for children and adolescents; Hypertension = systolic >140 mm Hg or diastolic >90 mm Hg, or systolic/diastolic percentile >95 for children and adolescents.<sup>12, 13</sup> Weight status categorized as follows: underweight = BMI <18.5 or BMI percentile <5 for children and adolescents; normal weight = BMI 18.5-25 or BMI percentile 5-85 for children and adolescents; overweight = BMI 25-30 or BMI percentile 85-95 for children and adolescents; obese = BMI ≥30 or BMI percentile >95<sup>th</sup> for children and adolescents.<sup>14</sup> Nephrotic Syndrome is categorized as UP:C ≥3.5 + edema or serum albumin <3.0.



**eTable 4. KRN: Baseline Demographic, Clinical, and Laboratory Characteristics of Participants by Age at FSGS Biopsy**

Descriptive statistics are presented as number (percent) or median (25th, 75th percentile).

| Characteristic                                           | Descriptive Statistics |                                 |                                        |                                        | p-value comparisons |              |               |            |         |
|----------------------------------------------------------|------------------------|---------------------------------|----------------------------------------|----------------------------------------|---------------------|--------------|---------------|------------|---------|
|                                                          | Overall<br>(n=184)     | 1: Children<br>Age<13<br>(n=53) | 2: Adolescents<br>Age:13- 17<br>(n=25) | 3:<br>Adults<br>Age:<br>≥18<br>(n=106) | 1 vs. 2 vs. 3       | 1+2<br>vs. 3 | 1<br>vs.<br>2 | 2 vs.<br>3 | 1 vs. 3 |
| Age at biopsy, years                                     | 22 (9, 42)             | 6 (3, 8)                        | 15 (13, 17)                            | 39 (28, 53)                            | ---                 | ---          | ---           | ---        | ---     |
| Female                                                   | 87 (47)                | 23 (43)                         | 10 (40)                                | 54 (51)                                | 0.49                | 0.25         | 0.78          | 0.32       | 0.37    |
| Race                                                     |                        |                                 |                                        |                                        | 0.10                | 0.12         | 0.20          | 0.29       | 0.08    |
| Asian                                                    | 16 (9)                 | 8 (15)                          | 0 (0)                                  | 8 (8)                                  |                     |              |               |            |         |
| Black                                                    | 28 (15)                | 8 (15)                          | 5 (20)                                 | 15 (14)                                |                     |              |               |            |         |
| Other                                                    | 21 (11)                | 2 (4)                           | 2 (8)                                  | 17 (16)                                |                     |              |               |            |         |
| White                                                    | 115 (63)               | 35 (66)                         | 18 (72)                                | 62 (58)                                |                     |              |               |            |         |
| Unknown, n                                               | 4 (2)                  | 0 (0)                           | 0 (0)                                  | 4 (4)                                  |                     |              |               |            |         |
| Hispanic                                                 | 39 (21)                | 7 (13)                          | 9 (36)                                 | 23 (22)                                | 0.07                | 0.74         | 0.02          | 0.17       | 0.16    |
| Age at kidney disease onset, years                       | 20 (8, 41)             | 3 (2, 6)                        | 13 (12, 16)                            | 39 (26, 53)                            | ---                 | ---          | ---           | ---        | ---     |
| UP:C within 1 month of biopsy, g/g                       | 4.0 (1.7, 7.6)         | 3.6 (0.8, 10.1)                 | 2.4 (2.0, 5.3)                         | 4.2 (1.9, 7.7)                         | 0.64                | 0.44         | 0.71          | 0.32       | 0.70    |
| eGFR within 1 month of biopsy, ml/min/1.73m <sup>2</sup> | 64 (33, 105)           | 138 (98, 170)                   | 94 (57, 118)                           | 42 (29, 90)                            | <0.001              | <0.001       | 0.03          | 0.01       | <0.001  |
| Serum albumin within 1 month of biopsy, g/dL             | 3.2 (2.0, 3.8)         | 3.0 (1.6, 3.5)                  | 3.3 (2.9, 3.4)                         | 3.6 (2.3, 3.9)                         | 0.27                | 0.14         | 0.39          | 0.43       | 0.13    |
| Treatment before biopsy                                  |                        |                                 |                                        |                                        |                     |              |               |            |         |
| Steroids                                                 | 38 (21)                | 17 (32)                         | 4 (16)                                 | 17 (16)                                | 0.05                | 0.07         | 0.14          | 0.99       | 0.02    |
| CNI                                                      | 21 (11)                | 8 (15)                          | 3 (12)                                 | 10 (9)                                 | 0.57                | 0.33         | 0.71          | 0.70       | 0.29    |
| CTX                                                      | 8 (4)                  | 5 (9)                           | 2 (8)                                  | 1 (1)                                  | 0.03                | 0.01         | 0.84          | 0.03       | 0.01    |

|                                                          |                               |         |         |         |                            |      |      |      |       |
|----------------------------------------------------------|-------------------------------|---------|---------|---------|----------------------------|------|------|------|-------|
| MMF                                                      | 15 (8)                        | 4 (8)   | 3 (12)  | 8 (8)   | 0.75                       | 0.73 | 0.52 | 0.47 | 1.00  |
| Rituximab                                                | 3(2)                          | 0(0)    | 0(0)    | 3(3)    | 0.33                       | 0.13 | ---  | 0.39 | 0.22  |
| <b>Characteristic</b>                                    | <b>Descriptive Statistics</b> |         |         |         | <b>p-value comparisons</b> |      |      |      |       |
| RAAS Blockade                                            | 29 (16)                       | 6(11)   | 3(12)   | 20(19)  | 0.04                       | 0.18 | 0.93 | 0.42 | 0.23  |
| IST after biopsy (among those naïve at biopsy)           |                               |         |         |         |                            |      |      |      |       |
| Steroids                                                 | 59 (40)                       | 15 (42) | 6 (29)  | 38 (43) | 0.49                       | 0.48 | 0.32 | 0.23 | 0.92  |
| CNI                                                      | 55 (34)                       | 22 (49) | 4 (18)  | 29 (30) | 0.02                       | 0.25 | 0.02 | 0.26 | 0.03  |
| CTX                                                      | 4 (2)                         | 1 (2)   | 0 (0)   | 3 (3)   | 0.70                       | 0.53 | 0.49 | 0.41 | 0.78  |
| MMF                                                      | 39 (23)                       | 13 (27) | 5 (23)  | 21 (21) | 0.79                       | 0.55 | 0.73 | 0.89 | 0.49  |
| Rituximab                                                | 24 (13)                       | 14 (26) | 2 (8)   | 8 (8)   | 0.004                      | 0.01 | 0.06 | 0.97 | 0.002 |
| RAAS Blockade after biopsy (among those naïve at biopsy) | 83 (54)                       | 20 (43) | 10 (45) | 53 (62) | 0.08                       | 0.02 | 0.82 | 0.17 | 0.03  |

Abbreviations: CNI, Calcineurin inhibitors; CTX, Cytoxan; eGFR, estimated glomerular filtration rate; IQR, interquartile range; IST, immunosuppressive therapy; KRN, Kidney Research Network; MMF, mycophenolate mofetil; RAAS, renin-angiotensin system; UP:C, urine protein: creatinine ratio

Definitions: *p*-value comparisons are from Kruskal-Wallis tests for continuous variables and chi-square tests for categorical variables. Percentages and *p*-values are based on complete case analyses (i.e., do not include participants with missing data). eGFR was calculated using the creatinine-based modified CKiD formula in children and adolescents and the CKD-EPI equation in adults.<sup>17, 18</sup>

**eTable 5. Pooled (NEPTUNE, KRN): Medication Exposures Before and After Biopsy by Age**

Descriptive statistics are presented as number (percent)

| Characteristic                                           | Descriptive Statistics |                                 |                                        |                                  | p-value comparisons |              |         |         |         |
|----------------------------------------------------------|------------------------|---------------------------------|----------------------------------------|----------------------------------|---------------------|--------------|---------|---------|---------|
|                                                          | Overall<br>(n=350)     | 1: Children<br>Age<13<br>(n=85) | 2: Adolescents<br>Age:13- 17<br>(n=54) | 3: Adults<br>Age: ≥18<br>(n=211) | 1 vs. 2<br>vs. 3    | 1+2 vs.<br>3 | 1 vs. 2 | 2 vs. 3 | 1 vs. 3 |
| IST before biopsy                                        |                        |                                 |                                        |                                  |                     |              |         |         |         |
| Steroids                                                 | 80 (23)                | 41 (48)                         | 12 (22)                                | 27 (13)                          | <0.001              | <0.001       | 0.002   | 0.08    | <0.001  |
| CNI                                                      | 30 (9)                 | 11 (13)                         | 6 (11)                                 | 13 (6)                           | 0.13                | 0.05         | 0.75    | 0.21    | 0.05    |
| CTX                                                      | 10 (3)                 | 6 (7)                           | 2 (4)                                  | 2 (1)                            | 0.02                | 0.01         | 0.41    | 0.14    | 0.003   |
| MMF                                                      | 21 (6)                 | 8 (9)                           | 4 (7)                                  | 9 (4)                            | 0.22                | 0.09         | 0.68    | 0.34    | 0.09    |
| Rituximab                                                | (1)                    | 0 (0)                           | 0 (0)                                  | 3 (1)                            | 0.37                | 0.16         | ---     | 0.38    | 0.27    |
| RAAS Blockade                                            | 100 (29)               | 17 (20)                         | 10 (19)                                | 73 (35)                          | 0.01                | 0.002        | 0.83    | 0.02    | 0.01    |
| IST after biopsy (among those naïve at biopsy)           |                        |                                 |                                        |                                  |                     |              |         |         |         |
| Steroids                                                 | 115 (43)               | 21 (48)                         | 15 (36)                                | 79 (43)                          | 0.52                | 0.87         | 0.26    | 0.39    | 0.56    |
| CNI                                                      | 97 (30)                | 40 (54)                         | 18 (38)                                | 39 (20)                          | <0.001              | <0.001       | 0.07    | 0.01    | <0.001  |
| CTX                                                      | 8 (2)                  | 3 (4)                           | 0 (0)                                  | 5 (2)                            | 0.37                | 0.95         | 0.16    | 0.26    | 0.52    |
| MMF                                                      | 51 (16)                | 19 (25)                         | 7 (14)                                 | 25 (12)                          | 0.04                | 0.05         | 0.15    | 0.76    | 0.01    |
| Rituximab                                                | 29 (8)                 | 17 (20)                         | 3 (6)                                  | 9 (4)                            | <0.001              | 0.001        | 0.02    | 0.70    | <0.001  |
| RAAS Blockade after biopsy (among those naïve at biopsy) | 155 (62)               | 34 (50)                         | 30 (68)                                | 91 (66)                          | 0.06                | 0.15         | 0.06    | 0.78    | 0.03    |

Abbreviations: CNI, Calcineurin inhibitors; CTX, Cytoxin; IST, immunosuppressive therapy; KRN, Kidney Research Network; MMF, mycophenolate mofetil; RAAS, renin-angiotensin system.

Definitions: p-value comparisons are from Kruskal-Wallis tests for continuous variables and chi-square tests for categorical variables. Percentages and p-values are based on complete case analyses (i.e., do not include participants with missing data).

**eTable 6. NEPTUNE: Logistic Regression Models of Immunosuppressive Therapy Treatment (Treated vs Untreated) Among Participants Who Were Treatment Naive at Biopsy**

(n=117 participants; n=57 events)

| <b>Unadjusted model</b>                 | <b>Odds ratio</b> | <b>95% confidence interval</b> | <b>P-value</b> |
|-----------------------------------------|-------------------|--------------------------------|----------------|
| Age, years                              |                   |                                |                |
| Children (<13)                          | 3.95              | 0.76 to 20.59                  | 0.10           |
| Adolescents (13-17)                     | 1.76              | 0.68 to 4.56                   | 0.25           |
| Adults (≥18)                            | REF               | REF                            | REF            |
| UP:C (g/g) at enrollment                |                   |                                |                |
| 0.3-1.4                                 | 0.09              | 0.03 to 0.28                   | <0.001         |
| 1.5-3.4                                 | 0.11              | 0.04 to 0.28                   | <0.001         |
| ≥3.5                                    | REF               | REF                            | REF            |
| eGFR (per 30ml/min/1.73m <sup>2</sup> ) | 1.08              | 0.73 to 1.59                   | 0.70           |
| <b>Adjusted model</b>                   |                   |                                |                |
| Age, years                              |                   |                                |                |
| Children (<13)                          | 4.19              | 0.50 to 35.29                  | 0.19           |
| Adolescents (13-17)                     | 6.84              | 1.80 to 25.96                  | 0.005          |
| Adults (≥18)                            | REF               | REF                            | REF            |
| UP:C at enrollment, g/g                 |                   |                                |                |
| 0.3-1.4                                 | 0.04              | 9.8E-03 to 0.16                | <0.001         |
| 1.5-3.4                                 | 0.07              | 0.03 to 0.22                   | <0.001         |
| ≥3.5                                    | REF               | REF                            | REF            |
| eGFR (per 30ml/min/1.73m <sup>2</sup> ) | 1.08              | 0.65 to 1.78                   | 0.77           |

Abbreviations: eGFR, estimated glomerular filtration rate; IST, immunosuppressive therapy; NEPTUNE, Nephrotic Syndrome Study Network; REF, reference; UP:C, urine protein: creatinine ratio;

**eTable 7. Sensitivity Analyses of Potential Confounding and Excluding Monogenic Disease**

|                                    | NEPTUNE                  |                          | FSGS-CT                  |                          | KRN                 |
|------------------------------------|--------------------------|--------------------------|--------------------------|--------------------------|---------------------|
|                                    | Known monogenic excluded | Known monogenic included | Known monogenic excluded | Known monogenic included |                     |
| Adjusted HR time to kidney failure |                          |                          |                          |                          |                     |
| Child vs. adult                    | 2.63 [0.75, 9.27]        | 2.68 [0.77, 9.37]        | 1.31 [0.52, 3.28]        | 1.29 [0.55, 3.02]        | 1.02 [0.56, 1.85]   |
| Adolescent vs. adult               | 2.09 [0.67, 6.51]        | 1.99 [0.64, 6.20]        | 1.44 [0.68, 3.06]        | 1.23 [0.60, 2.50]        | 0.92 [0.47, 1.80]   |
| Adjusted difference in eGFR slope  |                          |                          |                          |                          |                     |
| Child vs. adult                    | -2.25 [-6.33, 1.83]      | -2.03 [-5.92, 1.86]      | -2.19 [-9.15, 4.76]      | -2.30 [-9.06, 4.45]      | 0.02 [-0.58, 0.61]  |
| Adolescent vs. adult               | -3.36 [-7.32, 0.60]      | -2.89 [-6.68, 0.90]      | -5.86 [-12.76, 1.04]     | -5.23 [-11.85, 1.38]     | -0.09 [-0.76, 0.59] |
| Adjusted HR time to remission      |                          |                          |                          |                          |                     |
| Child vs. adult                    | 0.85 [0.30, 2.37]        | 0.81 [0.30, 2.19]        | 2.08 [0.83, 5.21]        | 1.87 [0.76, 4.58]        | ---                 |
| Adolescent vs. adult               | 1.51 [0.58, 3.92]        | 1.54 [0.60, 3.97]        | 1.30 [0.57, 2.96]        | 1.18 [0.53, 2.64]        | ---                 |
| Adjusted HR time to FPFE           |                          |                          |                          |                          |                     |
| Child vs. adult                    | 0.73 [0.34, 1.55]        | 0.57 [0.28, 1.18]        | 0.86 [0.42, 1.75]        | 0.85 [0.42, 1.73]        | ---                 |
| Adolescent vs. adult               | 0.72 [0.34, 1.55]        | 0.65 [0.31, 1.39]        | 1.13 [0.57, 2.21]        | 1.03 [0.54, 1.94]        | ---                 |

NEPTUNE: Adjusted for interstitial fibrosis, global sclerosis, steroid treatment, APOL1, and baseline eGFR and UP:C

FSGS-CT: adjusted for interstitial fibrosis, segmental sclerosis, months of prior steroids, APOL1, and baseline eGFR and UP:C

KRN: adjusted for baseline eGFR and CNI treatment

**eTable 8. Tests of Effect Modification in Cox Proportional Hazard Models of Time to ESKD or 40% Reduction in eGFR and of Time to Complete Remission by Study**

| Effect modifier                            | Time to ESKD or 40% reduction in eGFR , p-value <sup>^</sup> | Time to complete remission, p-value <sup>^</sup> |
|--------------------------------------------|--------------------------------------------------------------|--------------------------------------------------|
| <b>NEPTUNE</b>                             |                                                              |                                                  |
| Sex                                        | 0.10                                                         | 0.78                                             |
| Disease duration (<6 months vs. ≥6 months) | 0.65                                                         | 0.47                                             |
| APOL1 genotype (2 vs. 0-1 risk alleles)    | 0.75                                                         | 0.94                                             |
| UP:C at enrollment (>3.5g/g vs. ≤3.5g/g)   | 0.008                                                        | 0.58                                             |
| Nephrotic Syndrome at enrollment           | <0.001                                                       | 0.13                                             |
| Steroids (treated vs. untreated)           | 0.76                                                         | 0.99                                             |
| CNI (treated vs. untreated)                | 0.53                                                         | 0.99                                             |
| <b>FSGS-CT</b>                             |                                                              |                                                  |
| Sex                                        | 0.03                                                         | 0.17                                             |
| APOL1 genotype (2 vs. 0-1 risk alleles)    | 0.35                                                         | 0.99                                             |
| UP:C at enrollment (>3.5g/g vs. ≤3.5g/g)   | 0.16                                                         | 0.06                                             |
| Nephrotic Syndrome at enrollment           | 0.09                                                         | 0.11                                             |
| Treatment arm: CNI vs. MMF+dexamethasone   | 0.82                                                         | 0.21                                             |
| <b>KRN</b>                                 |                                                              |                                                  |
| Sex                                        | 0.56                                                         | ---                                              |
| Disease duration (<6 months vs. ≥6 months) | 0.25                                                         | ---                                              |
| Steroids (treated vs. untreated)           | 0.07                                                         | ---                                              |
| CNI (treated vs. untreated)                | 0.52                                                         | ---                                              |
| <b>Pooled</b>                              |                                                              |                                                  |
| Sex                                        | 0.19                                                         | 0.33                                             |
| Disease duration (<6 months vs. ≥6 months) | 0.19                                                         | 0.08                                             |
| APOL1 genotype (2 vs. 0-1 risk alleles)    | 0.66                                                         | 0.64                                             |
| UP:C at enrollment (>3.5g/g vs. ≤3.5g/g)   | 0.01                                                         | 0.09                                             |
| Nephrotic syndrome at enrollment           | 0.05                                                         | 0.23                                             |
| Steroids (treated vs. untreated)           | 0.15                                                         | ---                                              |
| CNI (treated vs. untreated)                | 0.21                                                         | ---                                              |

Abbreviations: APOL1, Apolipoprotein L1; CNI, Calcineurin inhibitors; eGFR, estimated glomerular filtration rate; MMF, mycophenolate mofetil; NEPTUNE, Nephrotic Syndrome Study Network; UP:C, urine protein: creatinine ratio

Definitions: Nephrotic Syndrome is categorized as UP:C≥3.5 + edema or serum albumin <3.0.

<sup>^</sup>p-value based on test of the interaction of potential effect modifier and age in separate Cox proportional hazards models for each outcome

**eTable 9. Results of Linear-Mixed Effects Models of eGFR After Biopsy by Study and Pooled**

| Covariate                                                                              | Beta coefficient | 95% confidence interval | p-value |
|----------------------------------------------------------------------------------------|------------------|-------------------------|---------|
| <b>A: NEPTUNE (n=166 participants; n=1,827 observations)</b>                           |                  |                         |         |
| Intercept                                                                              | 60.24            | ---                     | ---     |
| Time (years)                                                                           | -2.19            | -3.92 to -0.46          | 0.01    |
| Child vs. adult                                                                        | 34.20            | 23.19 to 45.21          | <0.001  |
| Adolescent vs. adult                                                                   | 20.25            | 8.81 to 31.68           | <0.001  |
| Time (years)*Child vs. adult                                                           | -2.12            | -5.54 to 1.29           | 0.22    |
| Time (years)*Adolescent vs. adult                                                      | -2.14            | -5.58 to 1.29           | 0.22    |
| <b>B: FSGS-CT (n=132 participants; n=1,992 observations)</b>                           |                  |                         |         |
| Intercept                                                                              | 63.61            | ---                     | ---     |
| Time (years)                                                                           | -2.64            | -6.96 to 1.69           | 0.23    |
| Child vs. adult                                                                        | 30.88            | 20.08 to 41.68          | <0.001  |
| Adolescent vs. adult                                                                   | 10.79            | 0.39 to 21.20           | 0.04    |
| Time (years)*Child vs. adult                                                           | -2.24            | -8.28 to 3.80           | 0.47    |
| Time (years)*Adolescent vs. adult                                                      | -3.65            | -9.57 to 2.26           | 0.23    |
| <b>C: KRN (n=184 participants; n=3,082 observations)</b>                               |                  |                         |         |
| Intercept                                                                              | 55.74            | ---                     | ---     |
| Time (years)                                                                           | -1.15            | -4.31 to 2.01           | 0.47    |
| Child vs. adult                                                                        | 37.67            | 21.14 to 54.19          | <0.001  |
| Adolescent vs. adult                                                                   | 21.80            | 2.11 to 41.49           | 0.03    |
| Time (years)*Child vs. adult                                                           | -0.25            | -4.14 to 3.65           | 0.90    |
| Time (years)*Adolescent vs. adult                                                      | -0.61            | -5.77 to 4.55           | 0.82    |
| <b>D: Pooled (NEPTUNE + FSGS-CT + KRN ) (n=482 participants; n=6,901 observations)</b> |                  |                         |         |
| Intercept                                                                              | 60.59            | ---                     | ---     |
| Time (years)                                                                           | -1.71            | -3.23 to -0.19          | 0.03    |
| Child vs. adult                                                                        | 33.69            | 27.04 to 40.34          | <0.001  |
| Adolescent vs. adult                                                                   | 15.91            | 9.06 to 22.76           | <0.001  |
| Time (years)*Child vs. adult                                                           | -1.61            | -3.97 to 0.75           | 0.18    |
| Time (years)*Adolescent vs. adult                                                      | -2.13            | -4.66 to 0.40           | 0.10    |

NOTE: Results correspond to Figure 2.

Definitions: eGFR distribution was winsorized to account for hyperfiltration. All eGFR values over 120 ml/min/1.73m<sup>2</sup> were imputed to 120 ml/min/1.73m<sup>2</sup>. Model included terms for random slope (time) and intercept (person).

**eFigure 1. NEPTUNE: Participants Included in NEPTUNE Analyses**

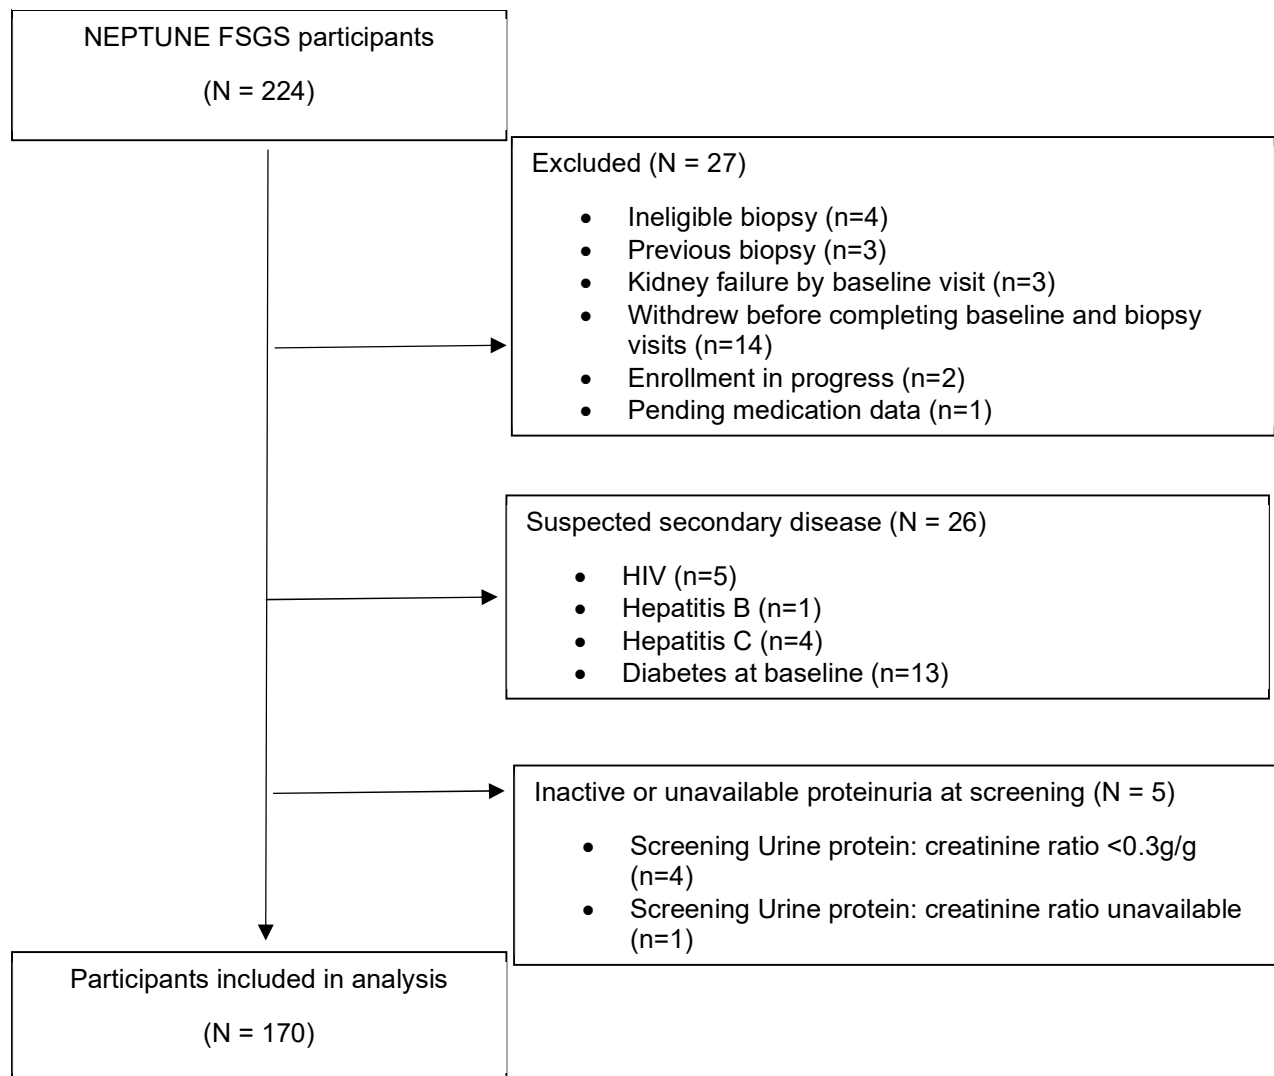



**eFigure 2. KRN: Participants Included in KRN Analyses**

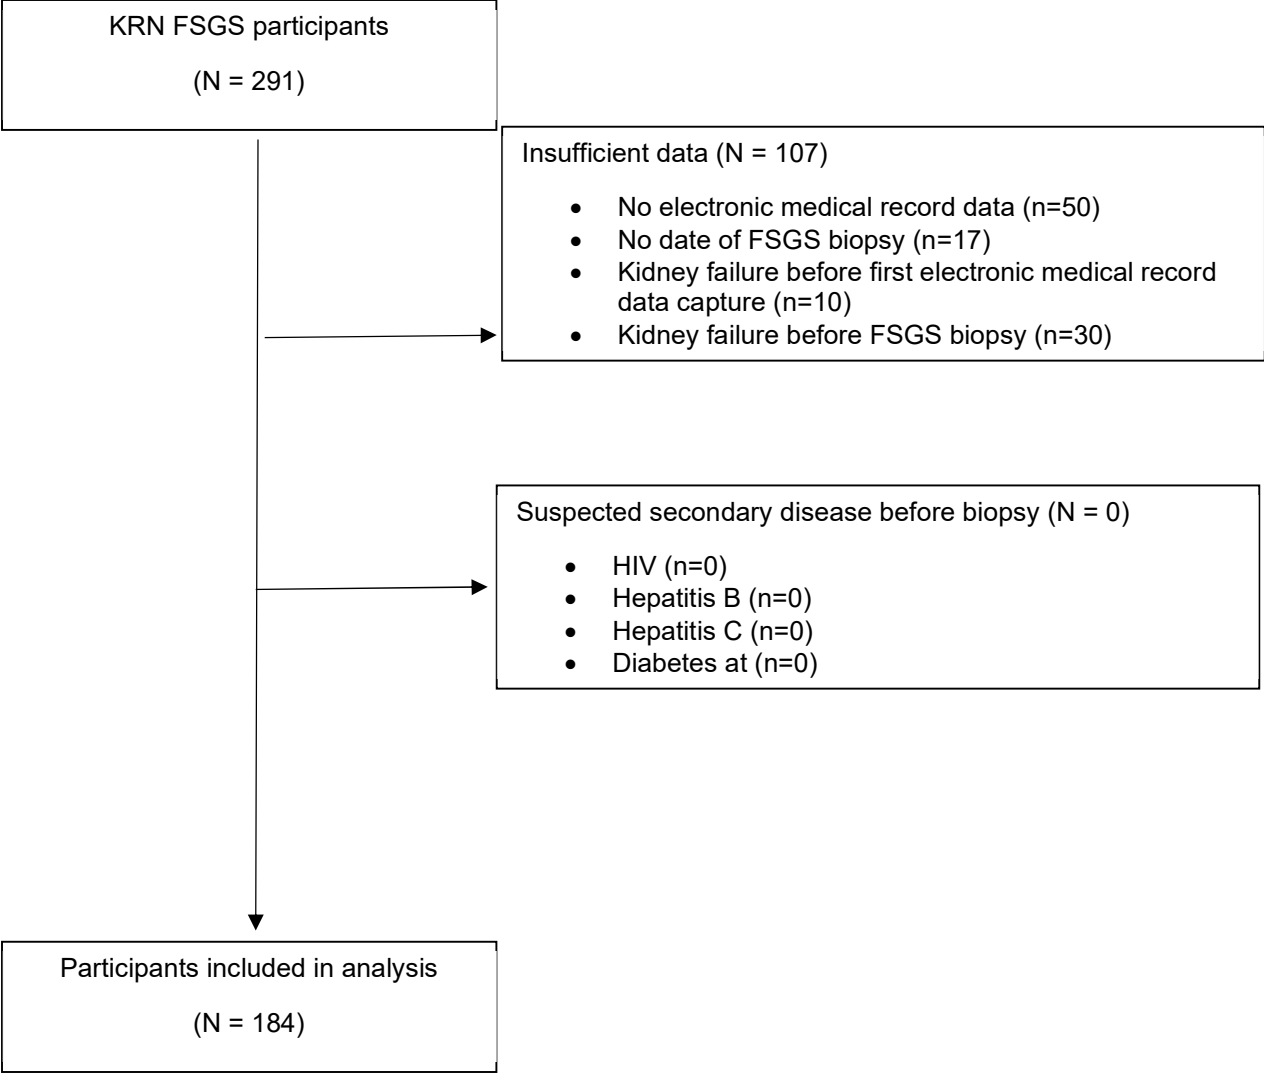

**eFigure 3. Time to ESKD by Age**

**eFigure 3A. Neptune - Time to ESKD by age Kaplan-Meier curve with logrank test**

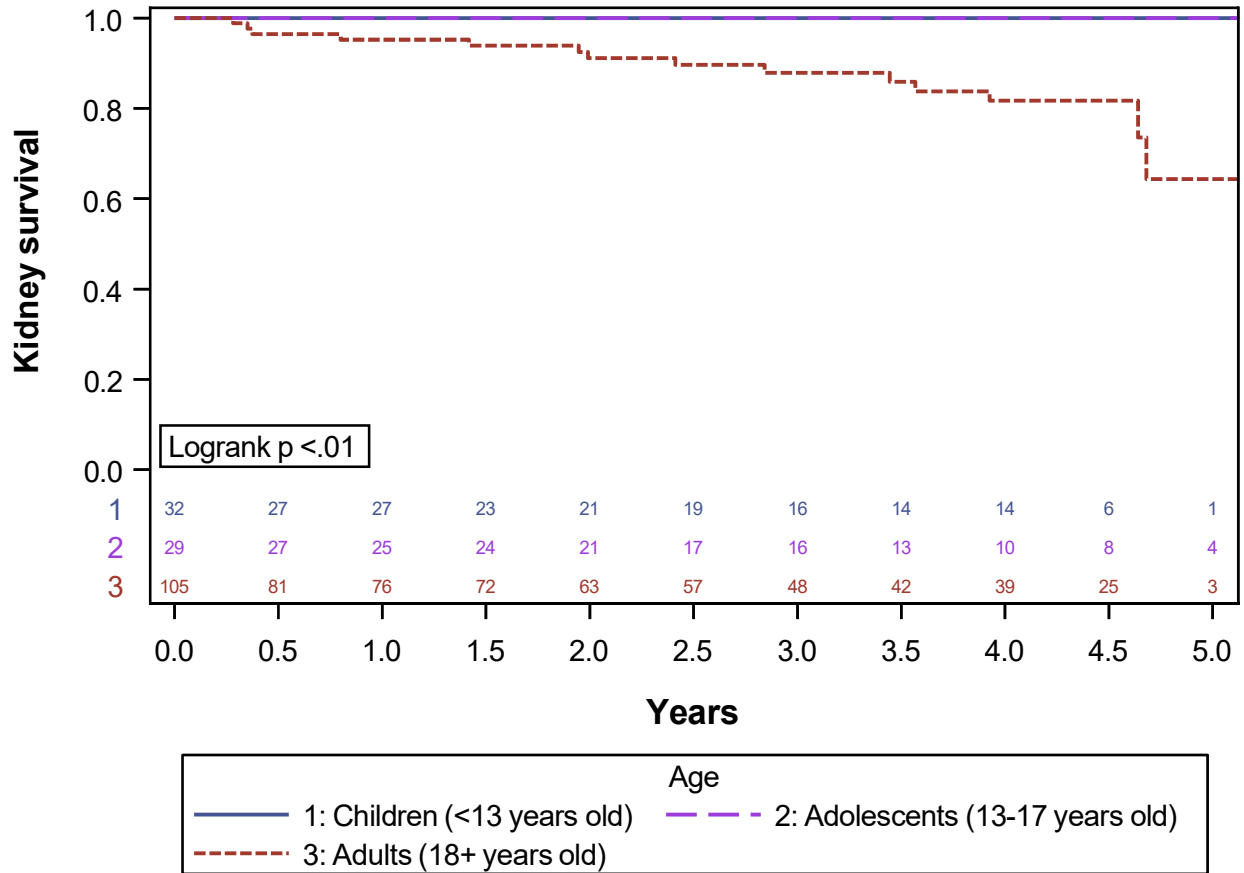

**eFigure 4B. FSGS-CT - Time to ESKD by age** Kaplan-Meier curve with logrank test

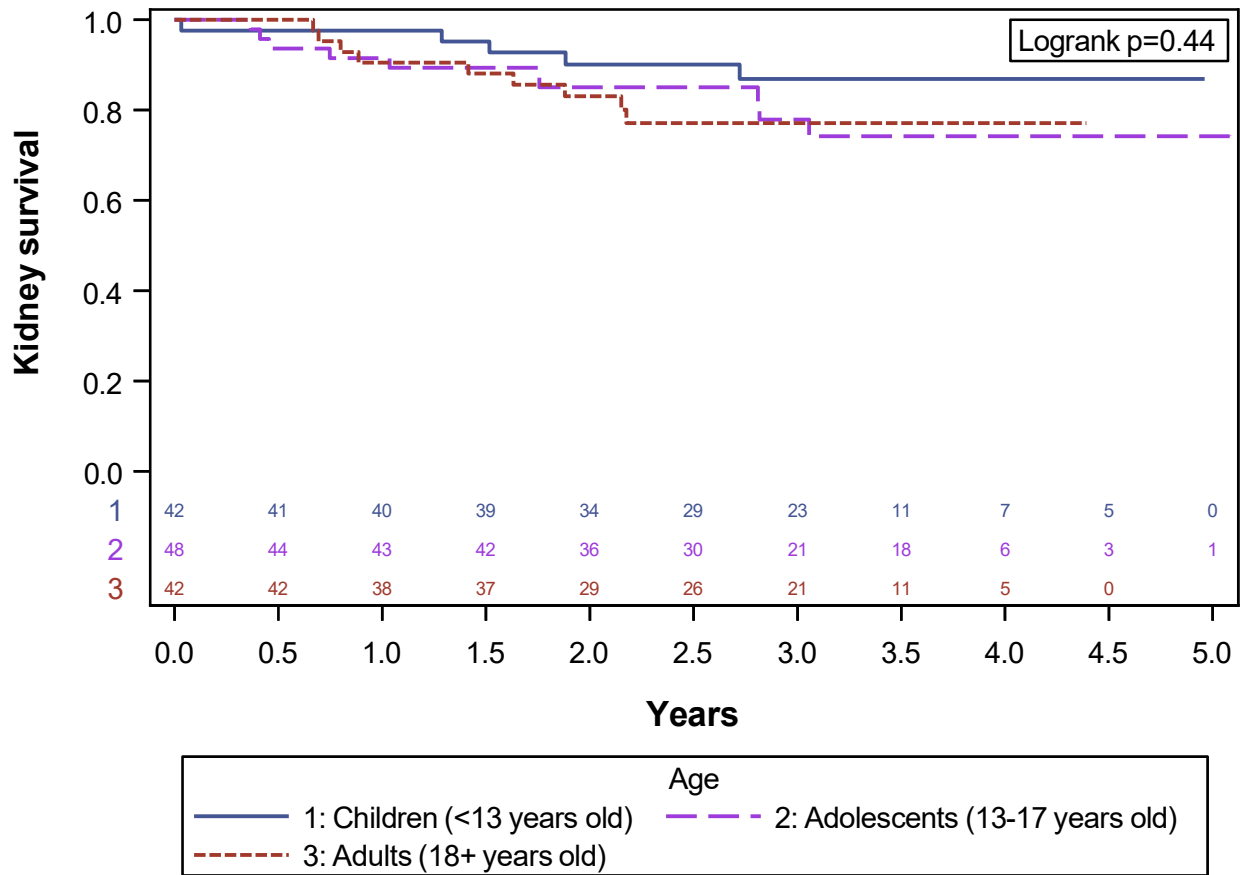

B: FSGS-CT n=132 participants; n=24 events

**eFigure 3C. KRN - Time to ESKD by age Kaplan-Meier with logrank test**

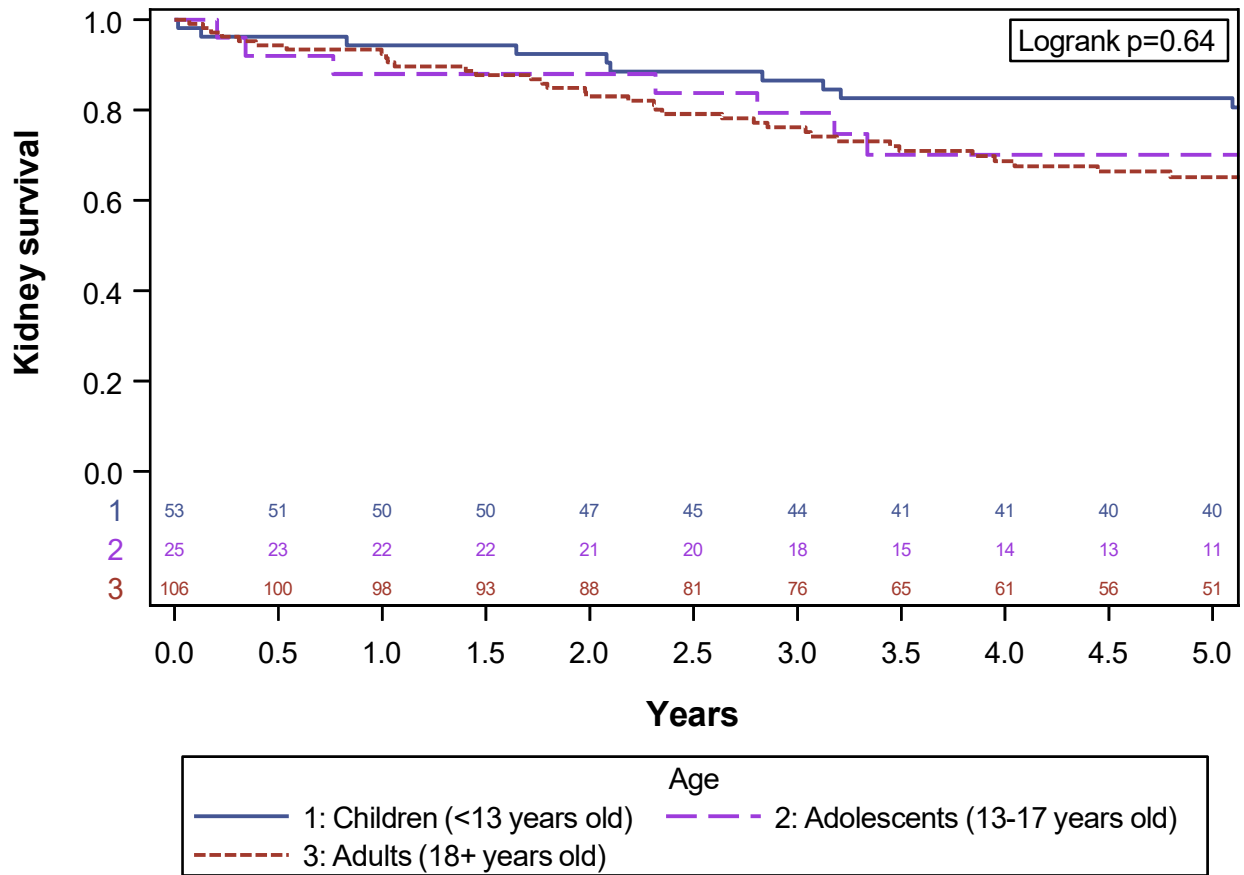

C: KRN n=184 participants; n=91 events

**eFigure 3D. Pooled - Time to ESKD by age Kaplan-Meier with logrank test**

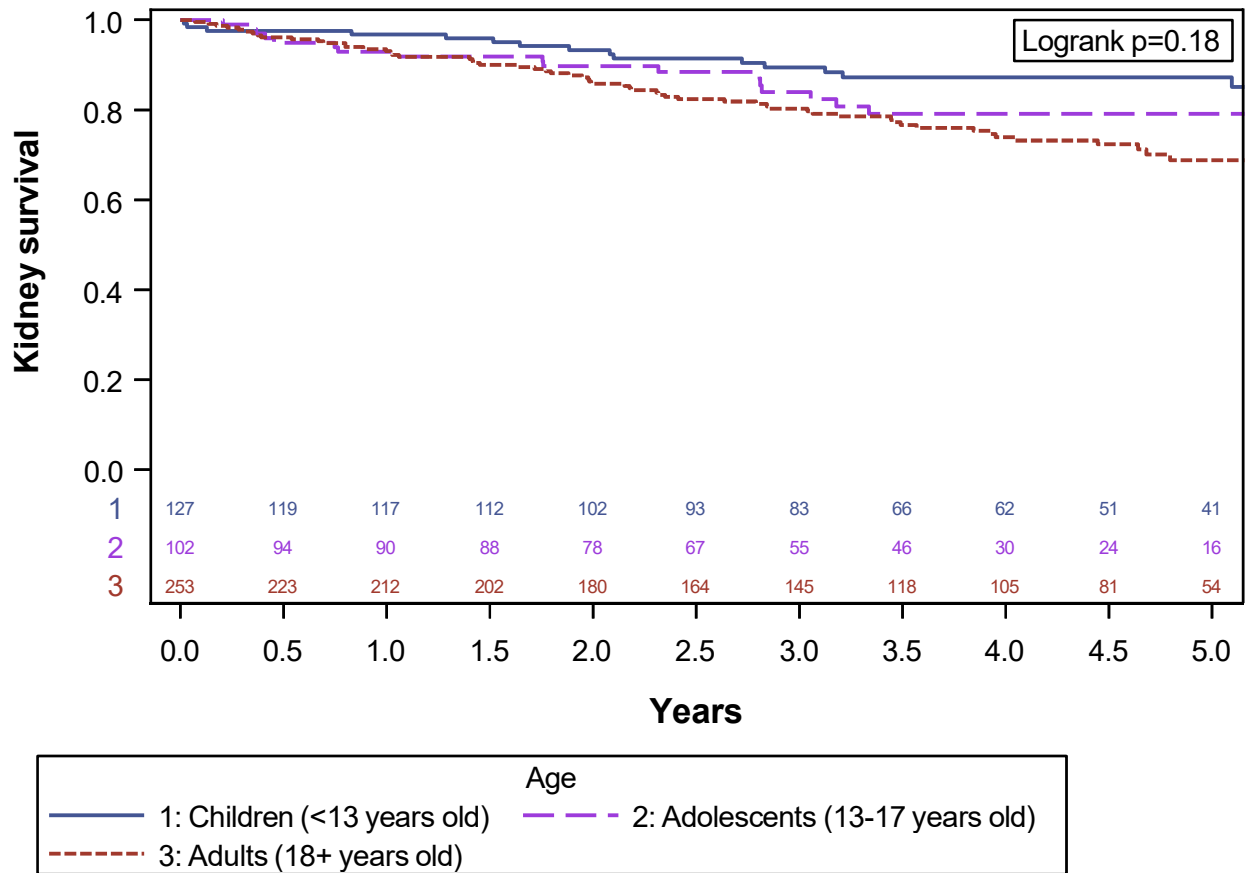

D: Pooled (NEPTUNE + FSGS-CT + KRN) n=482 participants; n=129 events

**eFigure 4. KRN: Time to ESKD by Age**

Kaplan-Meier with logrank test

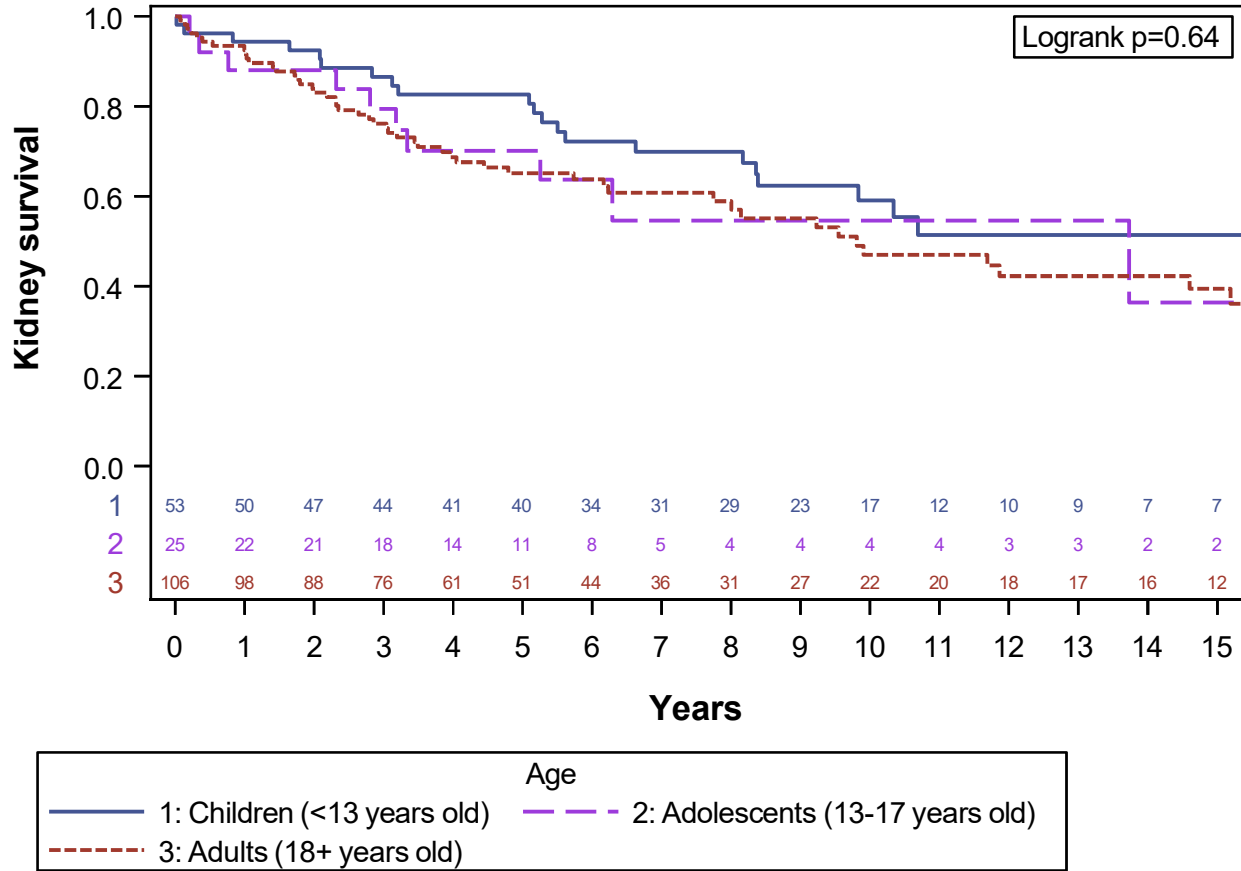

(n=184 participants; n=91 events)

**eFigure 5. Time to ESKD or 40% Reduction in eGFR by Age: Significant Effect Modification by Sex in FSGS-CT**

**eFigure 5A. Time to ESKD or 40% reduction in eGFR by age: effect modification in Females - FSGS-CT Kaplan-Meier with logrank test**

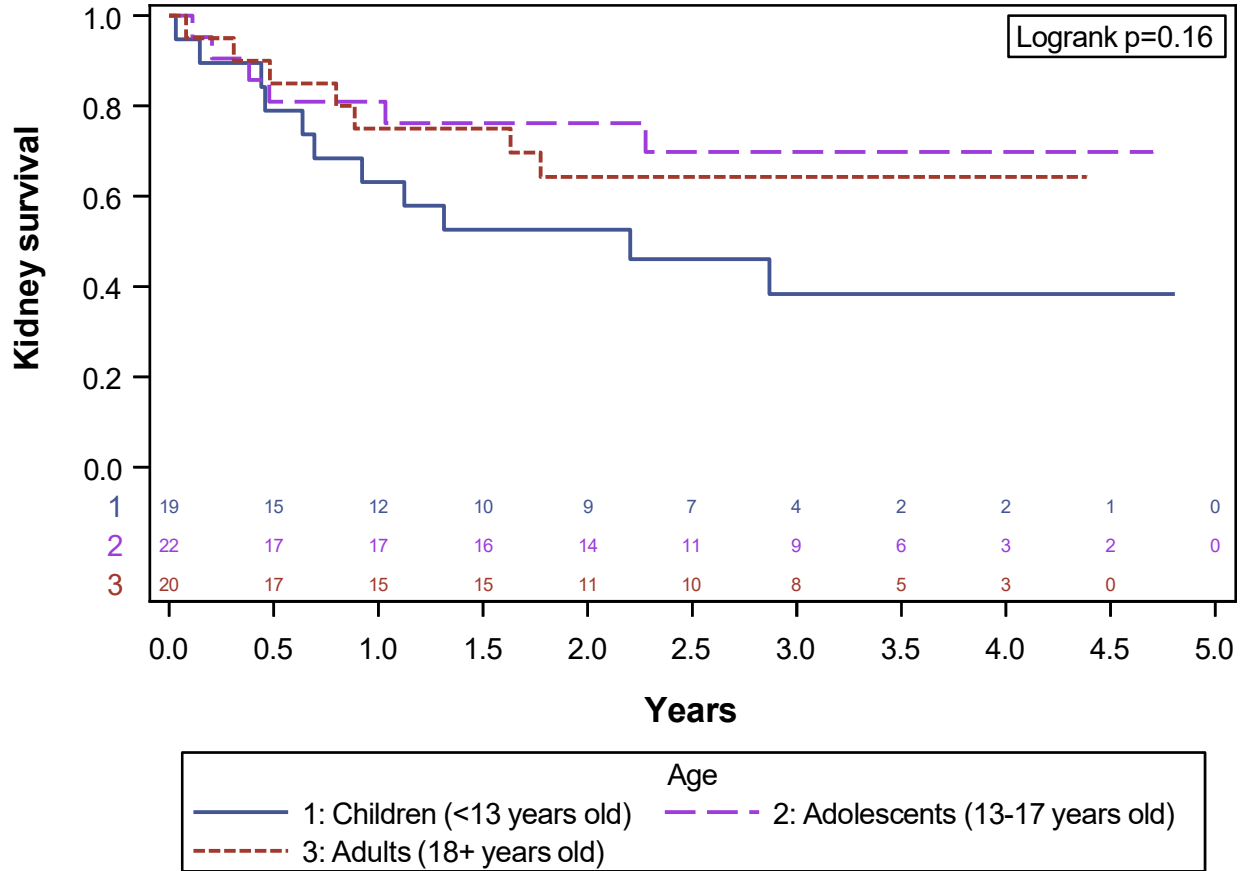

A: FSGS-CT females n=61 participants; n=24 events

**eFigure 5B. Time to ESKD or 40% reduction in eGFR by age: effect modification in Males - FSGS-CT Kaplan-Meier with logrank test**

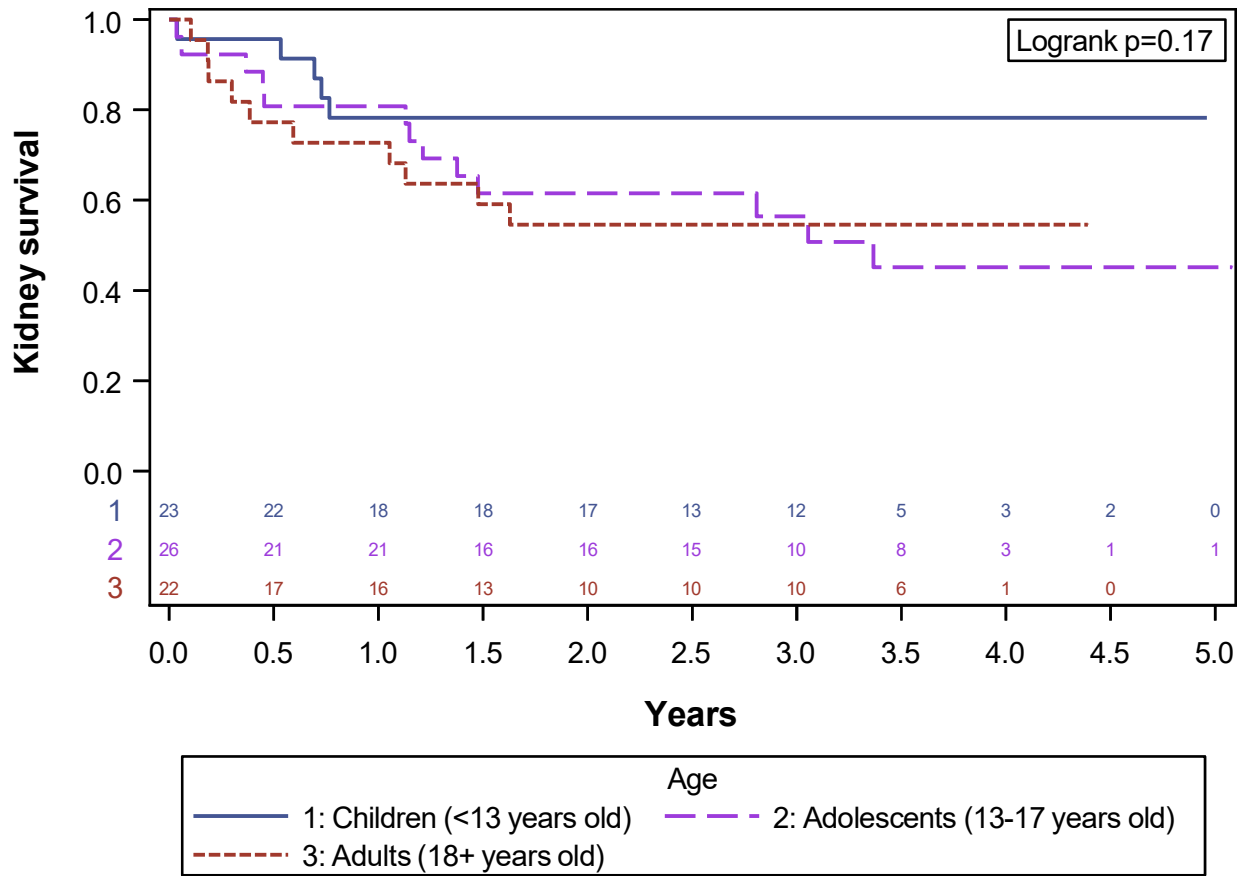

B: FSGS-CT males 71 participants; n=28 events



**eFigure 6. Time to ESKD or 40% Reduction in eGFR by Age: Significant Effect Modification by Baseline UP:C Ratio in NEPTUNE**

**eFigure 6A. Time to ESKD or 40% reduction in eGFR by age: effect modification by baseline UP:C >3.5g/g – NEPTUNE Kaplan-Meier with logrank test**

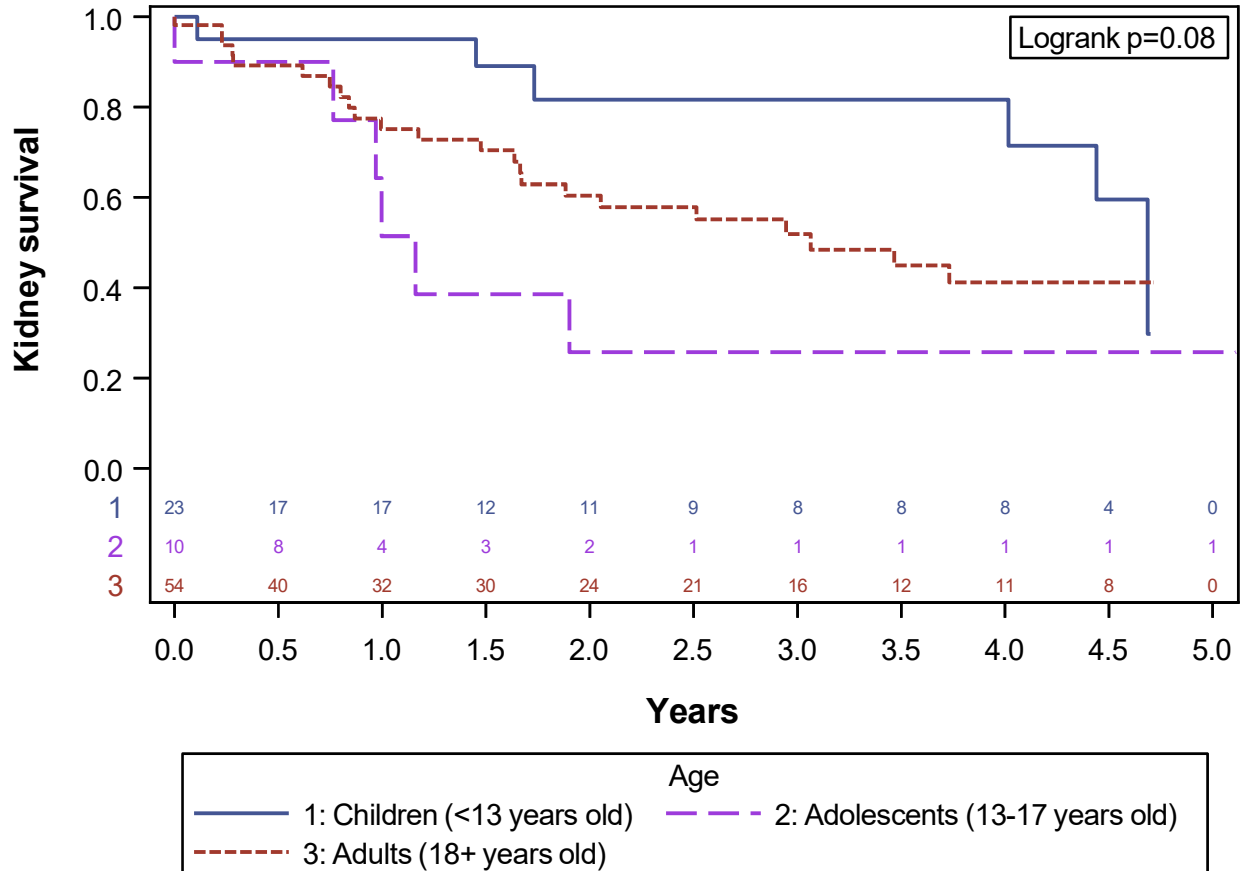

A: NEPTUNE UP:C>3.5g/g at baseline (n=87 participants; n=35 events)

**eFigure 6B. Time to ESKD or 40% reduction in eGFR by age: effect modification by baseline UP:C  $\leq$ 3.5g/g in NEPTUNE Kaplan-Meier with logrank test**

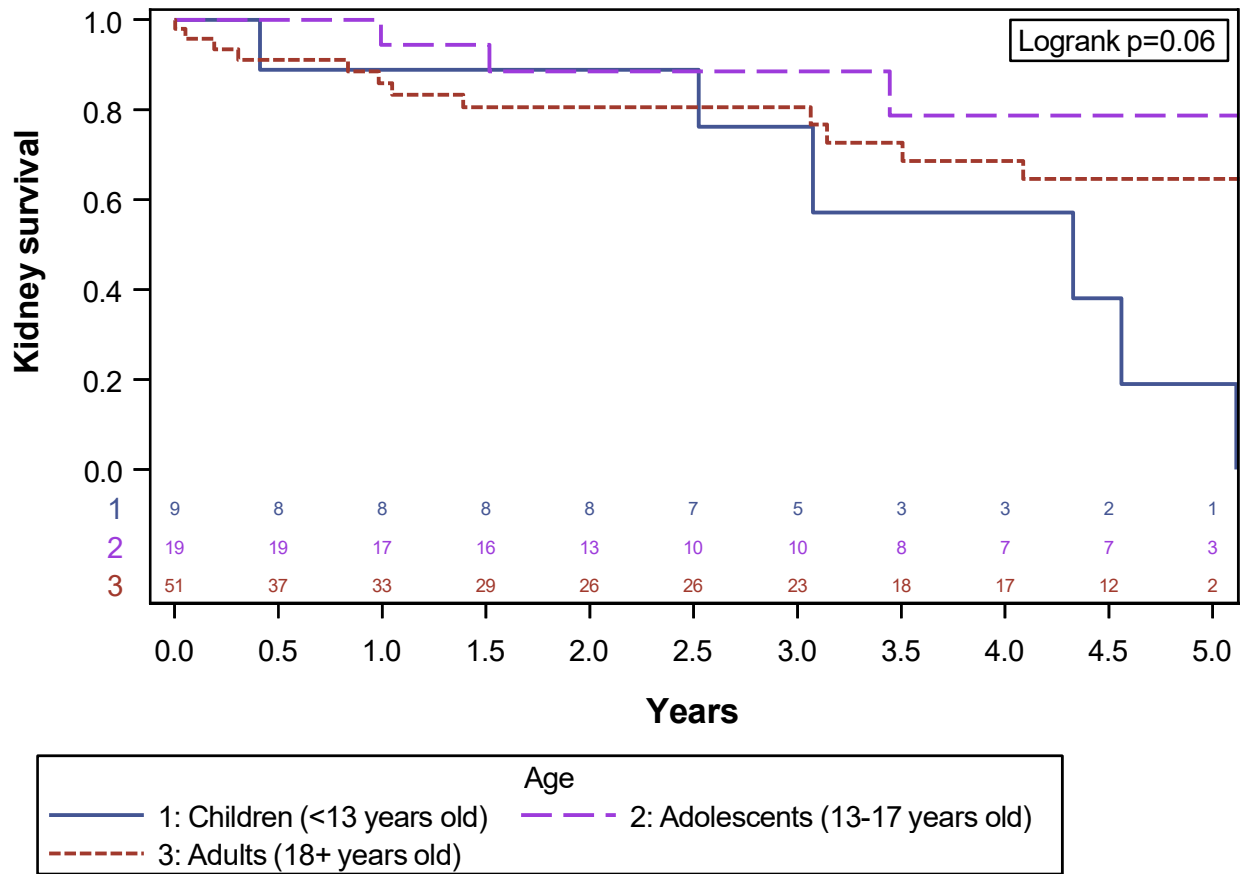

B: NEPTUNE UP:C $\leq$ 3.5g/g at baseline (n=79 participants; n=21 events)

**eFigure 7. Time To Complete or Partial Remission by Age (Partial Remission Defined as UP:C Ratio <3.5 g/g and 50% Reduction in UP:C Ratio From Baseline)**

**eFigure 75A. Time to complete/traditional partial remission by age – Neptune**  
Kaplan-Meier with logrank test

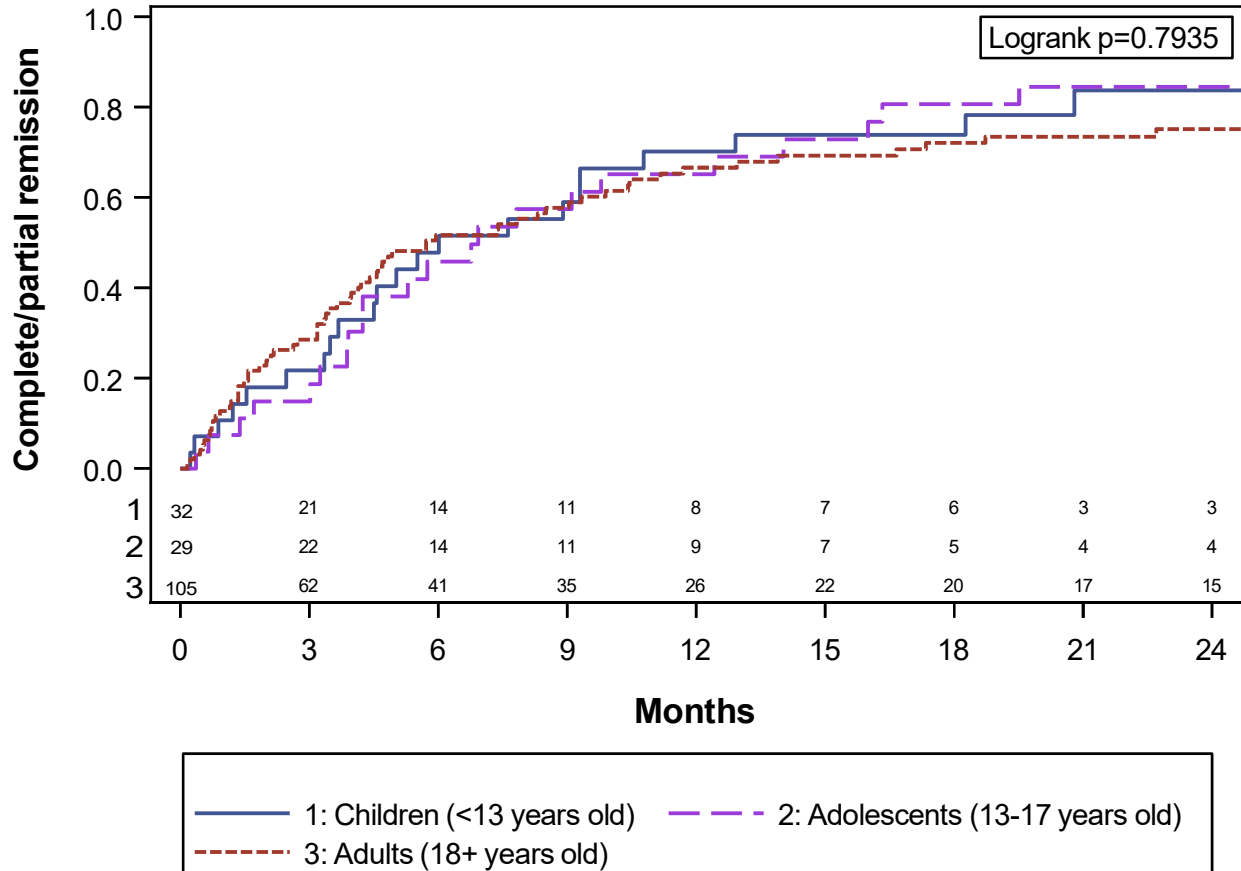

A: NEPTUNE n=166 participants; n=117 events  
Traditional Partial remission=UP:C<3.5g/g and 50% reduction in UP:C from baseline

**eFigure 7B. Time to complete/traditional partial remission by age – FSGS-CT**  
Kaplan-Meier with logrank test

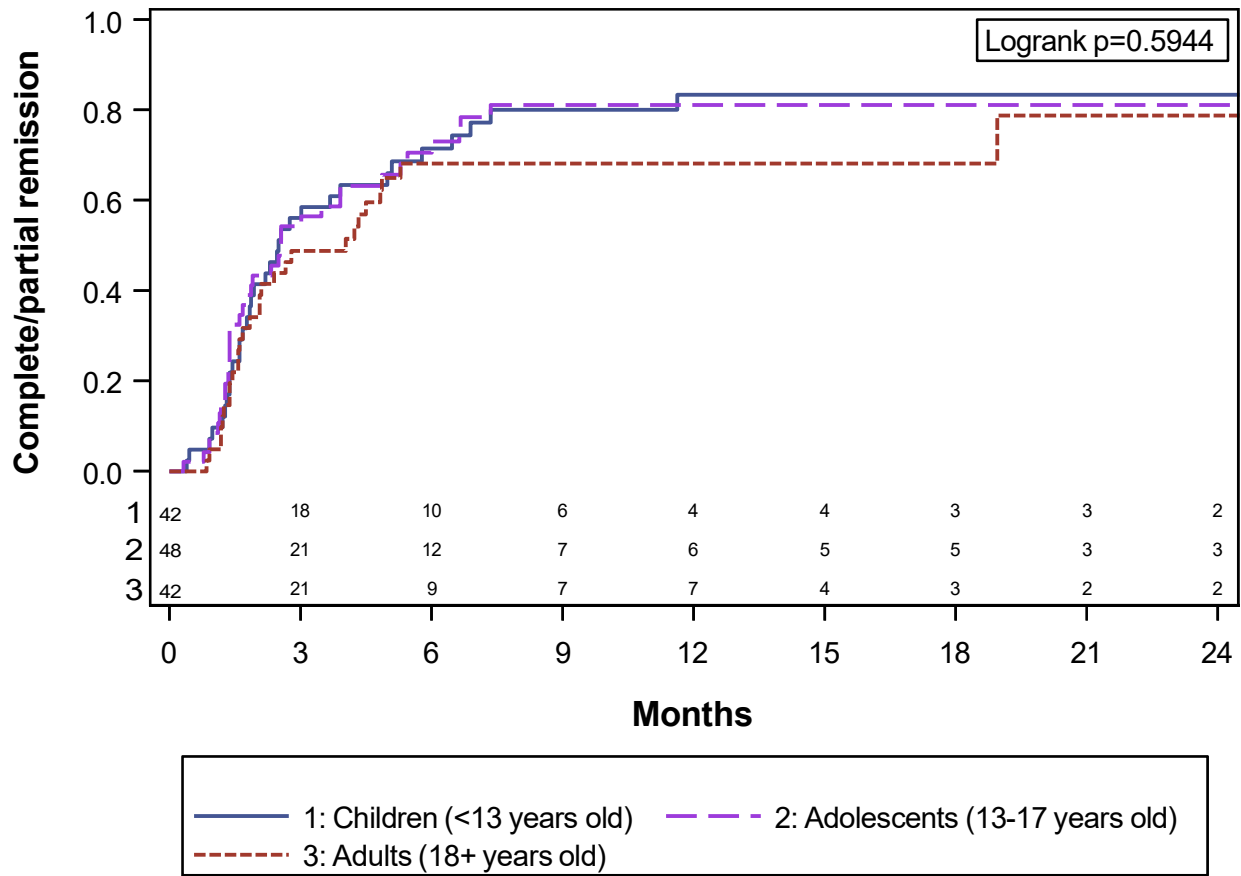

B: FSGS-CT n=132 participants; n=98 events  
Traditional Partial remission=UP:C<3.5g/g and 50% reduction in UP:C from baseline

**eFigure 7C. Time to complete/traditional partial remission by age – Pooled Kaplan-Meier with logrank test**

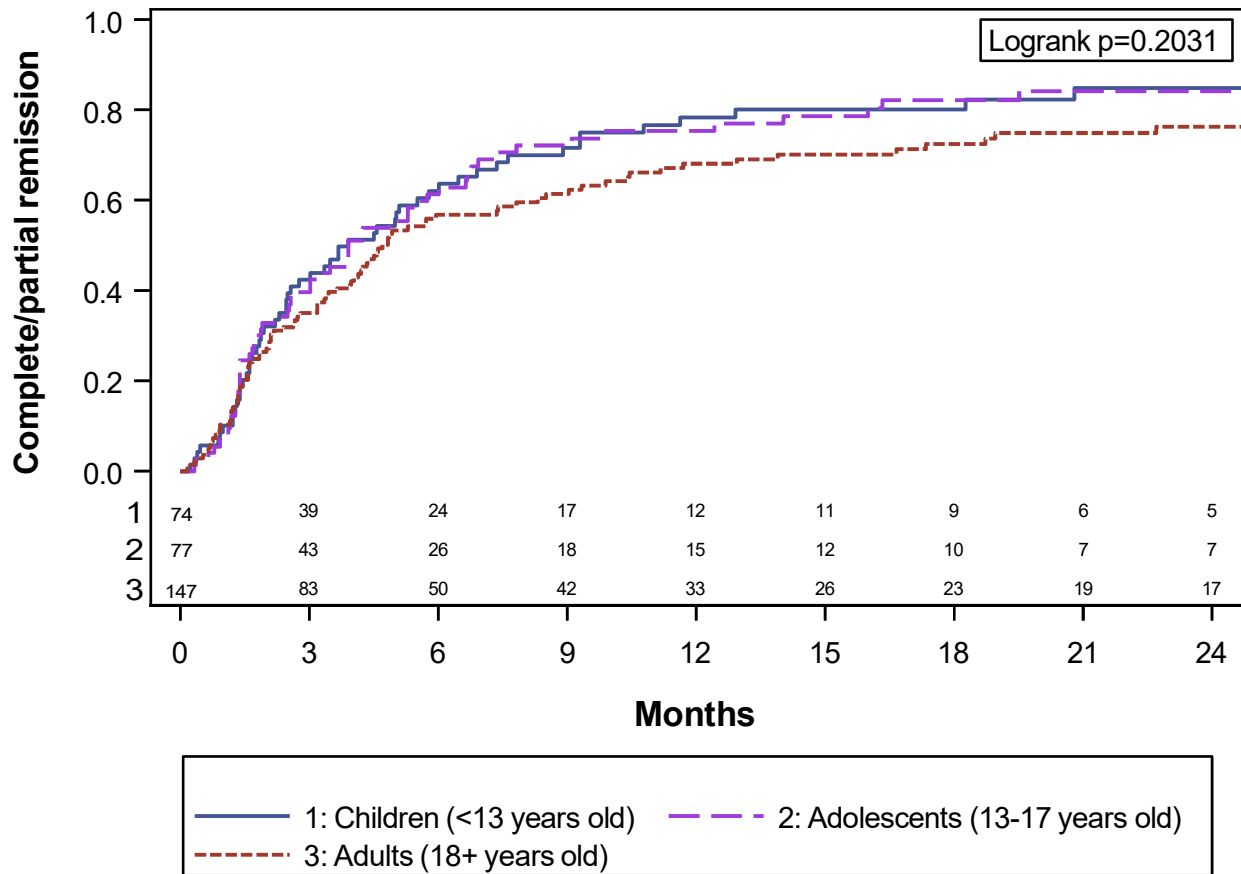

C: Pooled (NEPTUNE + FSGS-CT) n=298 participants; n=215 events  
 Traditional Partial remission=UP:C<3.5g/g and 50% reduction in UP:C from baseline
